# Supplementary material for: Ferrocenylalkylthiolate labeling of defects in alkylthiol self-assembled monolayers on gold
Source: Royal Society of Chemistry journal article supplement (doi:10.1039/b613598f), 2006-11-28
Supplement: b613598f.pdf [file b613598f.pdf]

Supporting Information

# Ferrocenylalkylthiolate Labeling of Defects in Alkylthiol Self-Assembled Monolayers on Gold

*Lawrence YoonSuk Lee and R. Bruce Lennox\**

Department of Chemistry and the FQRNT Centre for Self-Assembled Chemical Structures, McGill University, 801 Sherbrooke Street West, Montreal, Quebec, H3A 2K6, Canada

\* Corresponding author. Tel.: 514-398-3638. Fax: 514-398-3797. E-mail: [bruce.lennox@mcgill.ca](mailto:bruce.lennox@mcgill.ca)

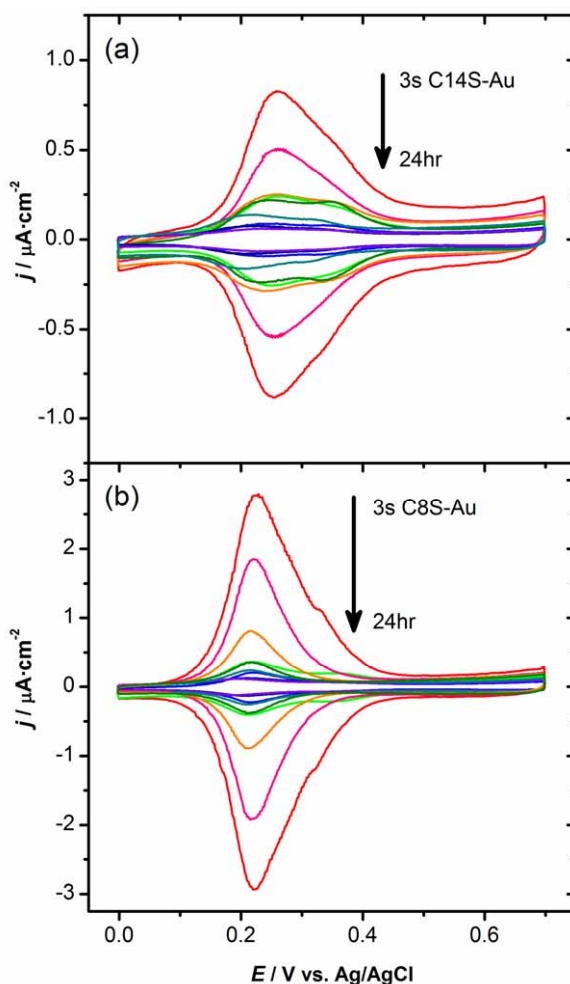

**Figure S1.** Labeling of defects in (a) C<sub>14</sub>S-Au and (b) C<sub>8</sub>S-Au SAMs that are formed using various incubation times ranging from 3s to 24 hrs. CVs are obtained in 1.0 M HClO<sub>4</sub> at a scan rate of 20 mV·s<sup>-1</sup>,

after labeled with 2 mM FcC<sub>12</sub>SH for 5s.

**Table S1. List of Kinetics Parameters obtained from the Fitting of Data in Figure 8 to Diffusion Limited Langmuir Second-Order Equation<sup>a</sup>**

| C <sub>14</sub> S-Au SAM formation conditions |                | <i>k</i> <sup>a</sup> (s <sup>-1/2</sup> ) | <i>A</i> <sup>a</sup> (%) |
|-----------------------------------------------|----------------|--------------------------------------------|---------------------------|
| Concentration                                 | Formation time |                                            |                           |
| 0 <sup>b</sup>                                | 0 <sup>b</sup> | 6.09                                       | 101.2                     |
| 200 μM                                        | 5 min          | 0.32                                       | 11.4                      |
| 200 μM                                        | 2 hrs          | 0.57                                       | 4.33                      |
| 1 mM                                          | 5 min          | 0.098                                      | 14.1                      |
| 1 mM                                          | 2 hrs          | 0.013                                      | 35.1                      |
| 5 mM                                          | 24 hrs         | 0.006                                      | 28.1                      |

<sup>a</sup>  $\Theta(t) = A * k * \sqrt{t} / (1 + k * \sqrt{t})$  where *A* is the final coverage and *k* is the reaction rate constant. <sup>b</sup> denotes that a bare Au electrode is used.
